# Supplementary material for: Assessment of Resection Margins in Bone Tumor Surgery
Source: Sarcoma. 2020 Dec 10;2020:5289547. doi: 10.1155/2020/5289547 (PMC7789471; doi:10.1155/2020/5289547)
Supplement: Supplementary Materials — The statistical data and the measurement data are available on a statistic.docx and measurementdata.xls. These files are also available from the corresponding author upon request. [file 5289547.f1.zip]

Archive with 2 entries (2 files):
- 5289547/measurementdata.xls
- 5289547/statistic.docx
