# Supplementary material for: Assessment of Resection Margins in Bone Tumor Surgery
Source: Sarcoma. 2020 Dec 10;2020:5289547. doi: 10.1155/2020/5289547 (PMC7789471; doi:10.1155/2020/5289547)
Supplement: Supplementary Materials — The statistical data and the measurement data are available on a statistic.docx and measurementdata.xls. These files are also available from the corresponding author upon request. [file 5289547.f1.zip › 5289547/measurementdata.xls]

## Sheet: Feuil1
																				Qualité de resection
Name	Surname	Date of birth	genre	Date of surgery	date last follow-up	Follow-up	Age (inter)	Date diagnosis	Type of tumor	Primitive or secondary tumor	Metastasis at the time of surgery	Side	Localisation	Zone	Chemeotherapy pre operative	Chemeotherapy post operative	PSI	Marge Planned	size planned	Anapath (R0,R1,R2)	Macro (R0,R1,R2)	MRI (R0,R1,R2)	Reconstruction	Local recurrence	Distant metastasis		Complication
1			M	2017-01-03	2020-03-02	3.16164	117.09	2016-10-06	OS	1	0	G	32	1	EURAMOS	EURAMOS	1	20	192	R0	R0	R0	2	0	1		Pulmonary metastases (remission) et pseudarthrosis allogreffe(2x).
																		23	205
2			F	2015-08-11	2019-10-16	4.18356	115.69	2015-03-07	EwS	1	0	G	Pelvis (Enneking zones)	1900-05-03	EuroEwing	VAI	1	10		R0	R0		2	0	0		Necrosis femoral head , denutrition et wound closure, infection Clostridium Latewayi et Staphylocoque aureus positive. Scoliose
						0
3			F	2016-02-12	2018-03-05	2.06027	116.197	2014-08-08	fibroux dysplasia	1	0	D	33	2	0	0	1	5		R0	R0	R0					/
						0												5
						0												5
						0												5
						0												5		R0	R0	R0	2	0	0		/
4			F	2016-02-12	2019-09-04	3.56164	116.197	2015-11-01	OS	1	0	D	2	2	EURAMOS	EURAMOS	1	10	142	R0	R0	R0	2	0	0		/
																			132
5			F	2016-01-12	2019-10-28	3.79452	116.112	2015-08-25	EwS	1	0	G	22	1	Euro-Ewing	Euro-Ewing	1	6	152	R0	R0	R0	2	0	0		Luxatie radial head. Radial fracture peri greffe, second surgery by osteosynthesis
																			159
6			F	2015-08-20	2020-03-03	4.53973	115.715	2015-03-01	EwS	1	0	D	3	1	VIDE		0		180	R0	R0	R0	1	0	0		second surgery for arthroplasty at 4 years and 6 month for axis complication
7			M	2015-03-18	2015-06-26	0.273973	115.29	2014-12-22	OS	2	3	D	3	1	OS Français 2006	OS Français 2006	0		110	R0	R0	R0	1	0	1		infection Pyo et entérocoque. Palliative	deced pulmonary metastases
8			M	2015-01-20	2020-01-16	4.99178	115.134	2014-10-17	OS	1	0	D	3	2	EURAMOS	EURAMOS	0		150	R0	R0	R0	1	0	0		wound closure failed
9			M	2016-07-22	2020-03-11	3.63836	116.638	2016-04-12	OS	1	0	G	3	2	EURAMOS	EURAMOS	0	31.6	175	R0	R0	R0	1	0	0		/
10			M	2016-11-22	2018-01-03	1.11507	116.975	2016-06-01	EwS	1	1	D	2	3	VIDE	VAI	0		90	R0	R0	R0	1	0	1			deced spine metastases with compression
11			M	2015-03-23	2017-02-05	1.87671	115.304	2013-12-01	EwS	1	0	D	Pelvis (Enneking zones)	1 2 3	Euro-Ewing	VAI	1	10mm		R0	R0	R0	1 2	0	1		wound closure failed, SPE, infection staph auréus.	deced pulmonary metastases
12			M	2016-08-19	2017-03-11	0.558904	116.715	2016-03-24	EwS	1	1	D	4	1	Euro-Ewing	Euro-Ewing	1	11	222	R0	R0	R0	3	0	0		Neuropathy	deced
																		mm
						3.74144

## Sheet: Docquier
Name		Bone MRI (R0,R1,R2)	MRI global (R0,R1,R2)	Size specimen (1)	Size specimen (2)	Margin MRI bone (mm) (3)	Margin MRI(4)	Margin MRI (5)	Margin MRI (6)	Margin MRI (7)
1	coupe 27					20	25	23	23
	coupe 26					22	24	23	23
	coupe 34					21	21	22	23
	coupe 30					23	23	24	26
	global	0	0	208	219	21	21	16	23
2	global	0	0			19	4	21
3		0	0			2	4	7	5	3
4	coupe 36 (T1)					52	45
	coupe 37 (T2)					52	45
	coupe 30 (T1)					20	10
	coupe 31 (T2)					19	9
	global (T1)	0	0	125	137	20	10
	global (T2)					19	9
5	coupe 26 (T1)					22	15	9
	coupe 33 (T2)					20	14	11
	coupe 31 (T1)					14	6	9
	coupe 37 (T2)					15	10	9
	global (T1)	0	0	151	156	14	6	9
	global (T2)					15	10	9
6	coupe 32					15	13
	coupe 34					15	14
	coupe 41					/	/
	global	0	0	155		15	13
7	coupe 42 (T1)					22	28
	coupe 41 (T2)					22	28
	coupe 30 (T1)					30	28
	coupe 29 (T2)					30	28
	coupe 40 (T1)					22	28
	coupe 39 (T2)					22	28
	coupe 27 (T1)					29	29
	coupe 26 (T2)					29	29
	global (T1)	0	0	111		22	29
	global (T2)	0	0	111		22	29
8	coupe 27 (T1)					56	46
	coupe 25 (T2)					56	53
	coupe 24 (T1)					54	48
	coupe 22 (T2)					55	54
	global (T1)	0	0	142		54	46
	global (T2)			142		55	53
9	coupe 21 (T1)					22	15
	coupe 18 (T2)					23	14
	coupe 23 (T1)					23	15
	coupe 20 (T2)					21	15
	coupe 26 (T1)					21	14
	coupe 23 (T2)					16	14
	coupe 28 (T1)					17	14
	coupe 25 (T2)					16	15
	global (T1)	0	0	164		17	14
	global (T2)	0	0	164		17	14
10	coupe 36 (T1)					18	19
	coupe 35 (T2)					19	20
	coupe 34 (T1)					19	19
	coupe 33 (T2)					19	19
	global (T1)	0	0	96		18	19
	global (T2)			96		18	19
11	global	0	0			11	27	18
12	coupe 34 (T1)					60	57
	coupe 33(T2)					63	74
	coupe 32 (T1)					61	81
	coupe 31 (T2)					60	80
	global (T1)	0	0	220		60	57
	global (T2)			220		60	57

## Sheet: Lecouvet
Name		Bone MRI (R0,R1,R2)	MRI global (R0,R1,R2)	Size specimen (1)	Size specimen (2)	Margin MRI bone (mm) (3)	Margin MRI(4)	Margin MRI (5)	Margin MRI (6)	Margin MRI (7)
1	coupe 27					21	24	23	25
	coupe 26					22	24	25	24
	coupe 34					22	24	23	27
	coupe 30					20	22	23	26
	global	0	0	207	218	20	22	23	24
2	global	0	0			26	15	19
3		0	0			2	8	13	5	3
4	coupe 36 (T1)					31	12
	coupe 37 (T2)					18	11
	coupe 30 (T1)					21	10
	coupe 31 (T2)					18	10
	global (T1)	0	0	117	142	18	11
	global (T2)	0	0			18	10
5	coupe 26 (T1)					8	3
	coupe 33 (T2)					8	2
	coupe 31 (T1)					9	2
	coupe 37 (T2)					9	2
	global (T1)	0	0	150	156	8	2
	global (T2)
6	coupe 32					11	14
	coupe 34					11	14
	coupe 41					8	10
	global	0	0	156		5	7
7	coupe 42 (T1)					19	33
	coupe 41 (T2)					20	29
	coupe 30 (T1)					24	31
	coupe 29 (T2)					23	30
	coupe 40 (T1)					21	29
	coupe 39 (T2)					20	33
	coupe 27 (T1)					21	29
	coupe 26 (T2)					23	28
	global (T1)	0	0	112		18	25
	global (T2)					18	25
8	coupe 27 (T1)					61	61
	coupe 25 (T2)					60	60
	coupe 24 (T1)					59	62
	coupe 22 (T2)					57	61
	global (T1)	0	0	132		59	61
	global (T2)					57	60
9	coupe 21 (T1)					23	15
	coupe 18 (T2)					20	15
	coupe 23 (T1)					25	15
	coupe 20 (T2)					22	14
	coupe 26 (T1)					21	14
	coupe 23 (T2)					20	13
	coupe 28 (T1)					18	15
	coupe 25 (T2)					18	14
	global (T1)	0	0	167		17	13
	global (T2)
10	coupe 36 (T1)					18	19
	coupe 35 (T2)					18	19
	coupe 34 (T1)					19	19
	coupe 33 (T2)					19	19
	coupe 39					20	20
	global (T1)	0	0	95
	global (T2)
11	global	0	0			8	/	/
12	coupe 34 (T1)					56	58
	coupe 33(T2)					57	68
	coupe 32 (T1)					62	66
	coupe 31 (T2)					78	79
	global (T1)	0	0	210		56	58
	global (T2)	0	0	210		57	62

## Sheet: Crutzen
Name		Bone MRI (R0,R1,R2)	MRI global (R0,R1,R2)	Size specimen (1)	Size specimen (2)	Margin MRI bone (mm) (3)	Margin MRI(4)	Margin MRI (5)	Margin MRI (6)	Margin MRI (7)
1	coupe 27					21	25	24	25
	coupe 26					22	25	25	25
	coupe 34					21	24	22	25
	coupe 30					21	23	23	25
	global	0	0	208	219	13	13	22	22
2	global	0	0			18	10	12
3						4	3	3	6	2
4	coupe 36 (T1)					53	45
	coupe 37 (T2)					53	46
	coupe 30 (T1)					22	9.5
	coupe 31 (T2)					20	9
	global (T1)	0	0	143	126	19	8
	global (T2)	0	0	143	126	19	8
5	coupe 26 (T1)					29	6	10
	coupe 33 (T2)					30	7	7
	coupe 31 (T1)					10	9	10
	coupe 37 (T2)					10	11	10
	global (T1)	0	0	150	156	10	8	13
	global (T2)	0	0	150	156	10	8	13
6	coupe 32						13
	coupe 34					14	14
	coupe 41					7	12
	global	0	0	157		7	8
7	coupe 42 (T1)					20	31
	coupe 41 (T2)					20	31
	coupe 30 (T1)					23	28
	coupe 29 (T2)					22	28
	coupe 40 (T1)					21	25
	coupe 39 (T2)					20	26
	coupe 27 (T1)					20	26
	coupe 26 (T2)					17	24
	global (T1)	0	0	112		17	21
	global (T2)	0	0
8	coupe 27 (T1)					61	60
	coupe 25 (T2)					61	61
	coupe 24 (T1)					59	61
	coupe 22 (T2)					59	61
	global (T1)	0	1	143		56	54
	global (T2)
9	coupe 21 (T1)					23	14
	coupe 18 (T2)					22	15
	coupe 23 (T1)					23	14
	coupe 20 (T2)					22	14
	coupe 26 (T1)					23	15
	coupe 23 (T2)					22	14
	coupe 28 (T1)					19	16
	coupe 25 (T2)					19	16
	global (T1)	0	0
	global (T2)	0	0	174		13	16
10	coupe 36 (T1)					18	18
	coupe 35 (T2)					19	19
	coupe 34 (T1)					18	18
	coupe 33 (T2)					19	19
	global (T1)	0	0	95		17	18
	global (T2)	0	0
	global	0	0			9
11	coupe 34 (T1)						66
12	coupe 33(T2)						66
	coupe 32 (T1)					63	83
	coupe 31 (T2)					63	83
	global (T1)	0	0	220
	global (T2)	0	0

## Sheet: Marges macro
Name		Bone MRI (R0,R1,R2)	MRI global (R0,R1,R2)	Size specimen (1)	Size specimen (2)	Margin MRI bone (mm) (3)	Margin MRI(4)	Margin MRI (5)	Margin MRI (6)	Margin MRI (7)
1	coupe 27			213	226	24	24	24	23
	coupe 26			220	232	/	/	25	21
	coupe 34			213	226	22	25	25	22
	coupe 30			213	223	22	24	22	27
	global	0	0
2	global
3		0	0	/	/	5	8	7	1.5
4	coupe 36 (T1)			130	152	56	47
	coupe 37 (T2)			130	152	56	47
	coupe 30 (T1)			127	148	22	11
	coupe 31 (T2)			127	148	22	11
	global (T1)	0	0
	global (T2)
5	coupe 26 (T1)			151	157	8	2	6
	coupe 33 (T2)			151	157	8	2	6
	coupe 31 (T1)			151	158	9	5	20
	coupe 37 (T2)			151	158	9	5	20
	global (T1)	0	0
	global (T2)
6	coupe 32			157		34	40
	coupe 34			158		10	12
	coupe 41			156		10	12
	global	0	0
7	coupe 42 (T1)			113		27	25
	coupe 41 (T2)			113		27	25
	coupe 30 (T1)			111		24	22
	coupe 29 (T2)			111		24	22
	coupe 40 (T1)			113		23	26
	coupe 39 (T2)			113		23	26
	coupe 27 (T1)			110		20	25
	coupe 26 (T2)			110		20	25
	global (T1)	0	0
	global (T2)
8	coupe 27 (T1)			143		63	59
	coupe 25 (T2)			143		63	59
	coupe 24 (T1)			141		59	60
	coupe 22 (T2)			141		59	60
	global (T1)	0	0
	global (T2)
9	coupe 21 (T1)			165		21	15
	coupe 18 (T2)			165		21	15
	coupe 23 (T1)			166		21	15
	coupe 20 (T2)			166		21	15
	coupe 26 (T1)			170		17	15
	coupe 23 (T2)			170		15	15
	coupe 28 (T1)			169		16	14
	coupe 25 (T2)			169		16	14
	global (T1)	0	0
	global (T2)
10	coupe 36 (T1)			100		19	17
	coupe 35 (T2)			100		19	17
	coupe 34 (T1)			101		22	18
	coupe 33 (T2)			101		22	18
	global (T1)	0	0
	global (T2)
	global	0	0			9	/	/
11	coupe 34 (T1)			224		50	70
12	coupe 33(T2)			224		50	70
	coupe 32 (T1)			224		59	90
	coupe 31 (T2)			224		59	90
	global (T1)	0	0
	global (T2)

## Sheet: Feuil2
Patient	cut	margin	Docquier	Lecouvet	Crutzen	Macro	margin planned		docquier - margin planned	lecouvet - margin planned	Crutzen - margin planned	macro - margin planned
1	27	3	20	21	21	24	20		0	1	1	4
1	27	4	25	24	25	24	20		5	4	5	4
1	27	5	23	23	24	24	10		13	13	14	14
1	27	6	23	25	25	23	23		0	2	2	0							guide de coupe
1	26	3	22	22	22		20		2	2	2							1	1		ok
1	26	4	24	24	25		20		4	4	5							2	1		ok
1	26	5	23	25	25	25	10		13	15	15	15						3	1		ok	!marge 5 ecart type 0-3,5
1	26	6	23	24	25	21	23		0	1	2	-2						4	1		ok
1	34	3	21	22	21	22	20		1	2	1	2						5	1		!!! Ecard type de 9 mm, longueur de résection exacte. Probable problème de planification pré opératoire.
1	34	4	21	24	24	25	20		1	4	4	5						6	0
1	34	5	22	23	22	25	10		12	13	12	15						7	0
1	34	6	23	27	25	22	23		0	4	2	-1						8	0
1	30	3	23	20	21	22	20		3	0	1	2						9	0
1	30	4	23	22	23	24	20		3	2	3	4						10	0
1	30	5	24	23	23	22	10		14	13	13	12						11	1		ok
1	30	6	26	26	25	27	23		3	3	2	4						12	1		ok
1	global	3	21	20	21	22	20		1	0	1	2
1	global	4	21	22	21	24	20		1	2	1	4
1	global	5	16	23	22	22	10		6	13	12	12
1	global	6	23	24	22	21	23		0	1	-1	-2
2	global	3	19	26	18		10		9	16	8				<3mm
2	global	4	4	15	10		10		-6	5	0
2	global	5	21	19	12		10		11	9	2				>3
3	global	3	2	2	3		5		-3	-3	-2
3	global	4	4	8	4	5	5		-1	3	-1	0
3	global	5	7	13	3	8	5		2	8	-2	3
3	global	6	5	5	6	7	5		0	0	1	2
3	global	7	3	3	2	1.5	5		-2	-2	-3	-3.5
4	36	3	52	31	53	56	19		33	12	34	37
4	36	4	45	12	45	47	10		35	2	35	37
4	37	3	52	18	53	56	19		33	-1	34	37
4	37	4	45	11	46	47	10		35	1	36	37
4	30	3	20	21	22	22	19		1	2	3	3
4	30	4	10	10	10	11	10		0	0	0	1
4	31	3	19	18	20	22	19		0	-1	1	3
4	31	4	9	10	9	11	10		-1	0	-1	1
4	global1	3	20	18	19	22	19		1	-1	0	3
4	global1	4	10	11	8	11	10		0	1	-2	1
4	global2	3	19	18	19	22	19		0	-1	0	3
4	global2	4	9	10	8	11	10		-1	0	-2	1
5	26	3	22	8	29	8	10		12	-2	19	-2
5	26	4	15	3	6	3	12		3	-9	-6	-9
5	26	5	9		10	6	6		3		4	0
5	33	3	20	8	30	8	10		10	-2	20	-2
5	33	4	14	3	7	3	12		2	-9	-5	-9
5	33	5	11		7	6	6		5		1	0
5	31	3	14	9	10	9	10		4	-1	0	-1
5	31	4	6	3	9	5	12		-6	-9	-3	-7
5	31	5	9		10	20	6		3		4	14
5	37	3	15	9	10	9	10		5	-1	0	-1
5	37	4	10	3	11	5	12		-2	-9	-1	-7
5	37	5	9		10	20	6		3		4	14
5	global1	3	14	8	10	8	10		4	-2	0	-2
5	global1	4	6	3	8	3	12		-6	-9	-4	-9
5	global1	5	9		13	6	6		3		7	0
5	global2	3	15	8	10	8	10		5	-2	0	-2
5	global2	4	10	3	8	3	12		-2	-9	-4	-9
5	global2	5	9		13	6	6		3		7	0
6	32	3	15	11		34			15	11	0	34
6	32	4	13	14	13	10			13	14	13	10
6	34	3	15	11	14	10			15	11	14	10
6	34	4	14	14	14	12			14	14	14	12
6	41	3		8	7	10			0	8	7	10
6	41	4		10	12	12			0	10	12	12
6	global	3	15	5	7	10			15	5	7	10
6	global	4	13	7	12	12			13	7	12	12
7	42	3	22	19	20	27			22	19	20	27
7	42	4	28	33	31	25			28	33	31	25
7	41	3	22	20	23	27			22	20	23	27
7	41	4	28	29	28	25			28	29	28	25
7	30	3	30	24	22	24			30	24	22	24
7	30	4	28	31	28	22			28	31	28	22
7	29	3	30	23	22	24			30	23	22	24
7	29	4	28	30	28	22			28	30	28	22
7	40	3	22	21	21	23			22	21	21	23
7	40	4	28	29	25	26			28	29	25	26
7	39	3	22	20	20	23			22	20	20	23
7	39	4	28	33	26	26			28	33	26	26
7	27	3	29	21	20	20			29	21	20	20
7	27	4	29	29	26	25			29	29	26	25
7	26	3	29	23	17	20			29	23	17	20
7	26	4	29	28	24	25			29	28	24	25
7	global1	3	22	18	17	20			22	18	17	20
7	global1	4	29	25	21	22			29	25	21	22
7	global2	3	22	18	17	20			22	18	17	20
7	global2	4	29	25	21	22			29	25	21	22
8	27	3	56	61	61	63			56	61	61	63
8	27	4	46	61	60	59			46	61	60	59
8	25	3	56	60	61	63			56	60	61	63
8	25	4	53	60	61	59			53	60	61	59
8	24	3	54	59	59	59			54	59	59	59
8	24	4	48	62	61	60			48	62	61	60
8	22	3	55	57	59	59			55	57	59	59
8	22	4	54	61	61	60			54	61	61	60
8	global1	3	54	59	56	59			54	59	56	59
8	global1	4	46	61	54	59			46	61	54	59
8	global2	3	55	57	56	59			55	57	56	59
8	global2	4	53	60	54	59			53	60	54	59
9	21	3	22	23	23	21			22	23	23	21
9	21	4	15	15	14	15			15	15	14	15
9	18	3	23	20	22	21			23	20	22	21
9	18	4	14	15	15	15			14	15	15	15
9	23	3	23	25	23	21			23	25	23	21
9	23	4	15	15	14	15			15	15	14	15
9	20	3	21	22	22	21			21	22	22	21
9	20	4	15	14	14	15			15	14	14	15
9	26	3	21	21	23	17			21	21	23	17
9	26	4	14	14	15	15			14	14	15	15
9	23	3	16	20	22	15			16	20	22	15
9	23	4	14	13	14	15			14	13	14	15
9	28	3	17	18	19	16			17	18	19	16
9	28	4	14	15	16	14			14	15	16	14
9	25	3	16	18	19	16			16	18	19	16
9	25	4	15	14	16	14			15	14	16	14
9	global1	3	17	17	16				17	17	16	0
9	global1	4	14	13	13				14	13	13	0
9	global2	3	17	17	16				17	17	16	0
9	global2	4	14	13	13				14	13	13	0
10	36	3	18	18	18	19			18	18	18	19
10	36	4	19	19	18	17			19	19	18	17
10	35	3	19	18	19	19			19	18	19	19
10	35	4	20	19	19	17			20	19	19	17
10	34	3	19	19	18	22			19	19	18	22
10	34	4	19	19	18	18			19	19	18	18
10	33	3	19	19	19	22			19	19	19	22
10	33	4	19	19	19	18			19	19	19	18
10	global1	3	18	18	17				18	18	17	0
10	global1	4	19	19	18				19	19	18	0
10	global2	3	18	18	17				18	18	17	0
10	global2	4	19	19	18				19	19	18	0
11	global	3	11	8	9	9	10		1	-2	-1	-1
11	global	4					10
11	global	5					10
12	34	3	60	56	58	50	10		50	46	48	40
12	34	4	57	58	66	70	10		47	48	56	60
12	33	3	63	57	60	50	10		53	47	50	40
12	33	4	74	68	66	70	10		64	58	56	60
12	32	3	61	62	63	59	10		51	52	53	49
12	32	4	81	66	83	90	10		71	56	73	80
12	31	3	60	78	63	59	10		50	68	53	49
12	31	4	80	79	83	90	10		70	69	73	80
12	global1	3	60	56	63	70	10		50	46	53	60
12	global1	4	57	58	66	50	10		47	48	56	40
12	global2	3	60	57	63	70	10		50	47	53	60
12	global2	4	57	62	66	50	10		47	52	56	40

## Sheet: Feuil3
Patient	Operator	bone margin	margin (soft+bone)
1	1	R0	R0
2	1	R0	R0				1	Docquier
3	1	R0	R0				2	Lecouvet
4	1	R0	R0				3	Anapath
5	1	R0	R0
6	1	R0	R0
7	1	R0	R0
8	1	R0	R0
9	1	R0	R0
10	1	R0	R0
11	1	R0	R0
12	1	R0	R0
1	2	R0	R0
2	2	R0	R0
3	2	R0	R0
4	2	R0	R0
5	2	R0	R0
6	2	R0	R0
7	2	R0	R0
8	2	R0	R0
9	2	R0	R0
10	2	R0	R0
11	2	R0	R0
12	2	R0	R0
1	3	R0	R0
2	3	R0	R0
3	3	R0	R0
4	3	R0	R0
5	3	R0	R0
6	3	R0	R0
7	3	R0	R0
8	3	R0	R0
9	3	R0	R0
10	3	R0	R0
11	3	R0	R0
12	3	R0	R0

## Sheet: Feuil4
Patient	slice	size specimen MRI (docquier)	size specimen MRI (Lecouvet)	size specimen MRI (Crutzen)	Size specimen Macro	Distance planned	PSI		docquier-planned	Lecouvet-planned	Crutzen- planned	macro - planned
1	1	208	207	208	213	202	1		6	5	6	11
1	2	219	218	219	226	215	1		4	3	4	11
2	1						1		0	0	0	0
3	1						1		0	0	0	0
4	1	125	125	126	128	123	1		2	2	3	5
4	2	137	142	143	150	142	1		-5	0	1	8
5	1	151	150	150	151	152	1		-1	-2	-2	-1
5	2	156	156	156	157	159	1		-3	-3	-3	-2
6	1	155	156	157	157	160	0		-5	-4	-3	-3
7	1	111	112	112	112	110	0		1	2	2	2
8	1	142	142	143	142	150	0		-8	-8	-7	-8			pas de guide
9	1	164	167	174	167	175	0		-11	-8	-1	-8
10	1	96	95	95	100	90	0		6	5	5	10
11	1						1		0	0	0	0
12	1	220	210	220	224	222	1		-2	-12	-2	2
